# Supplementary material for: MC EMiNEM Maps the Interaction Landscape of the Mediator
Source: PubMed Central journal article supplement (PMC3380870; doi:10.1371/journal.pcbi.1002568), 2012-06-21

Med10Med21, downregulated: STB5

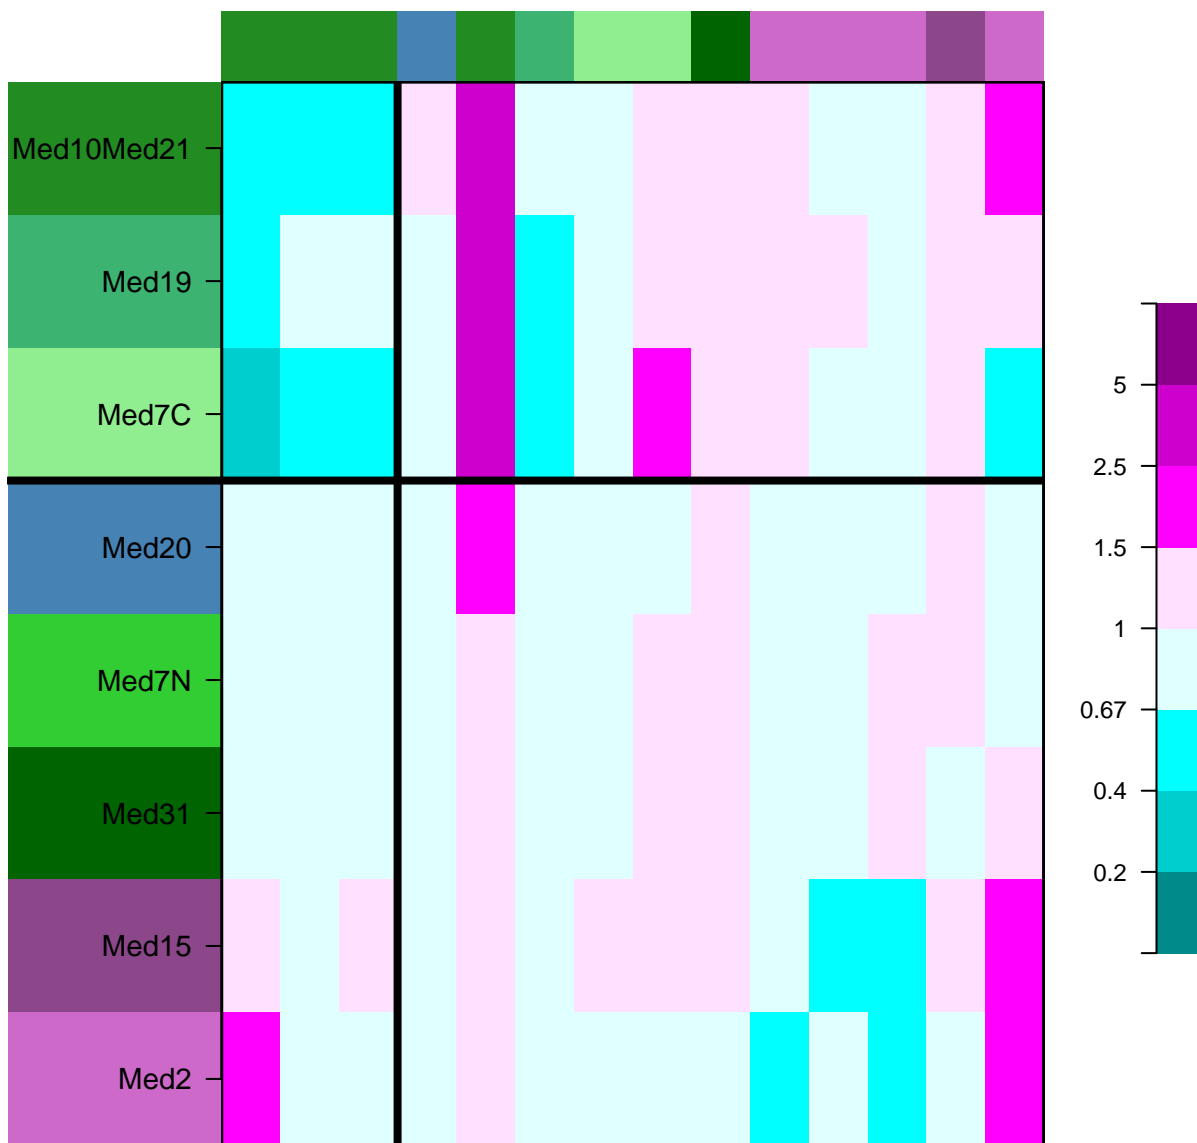

Med10Med21, upregulated: UME6

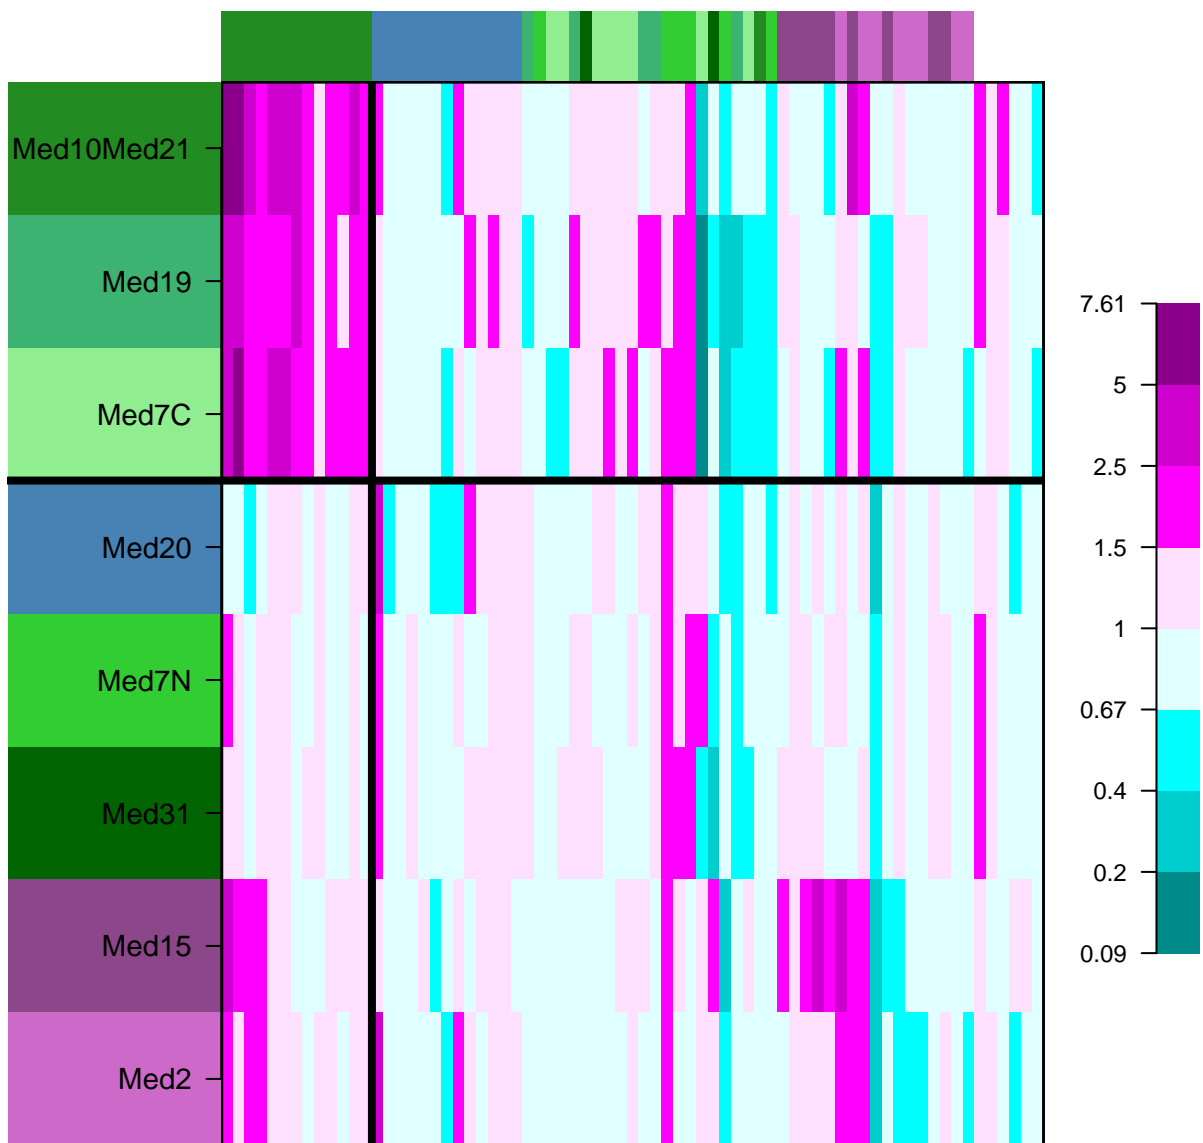





Med10Med21, upregulated: SKN7

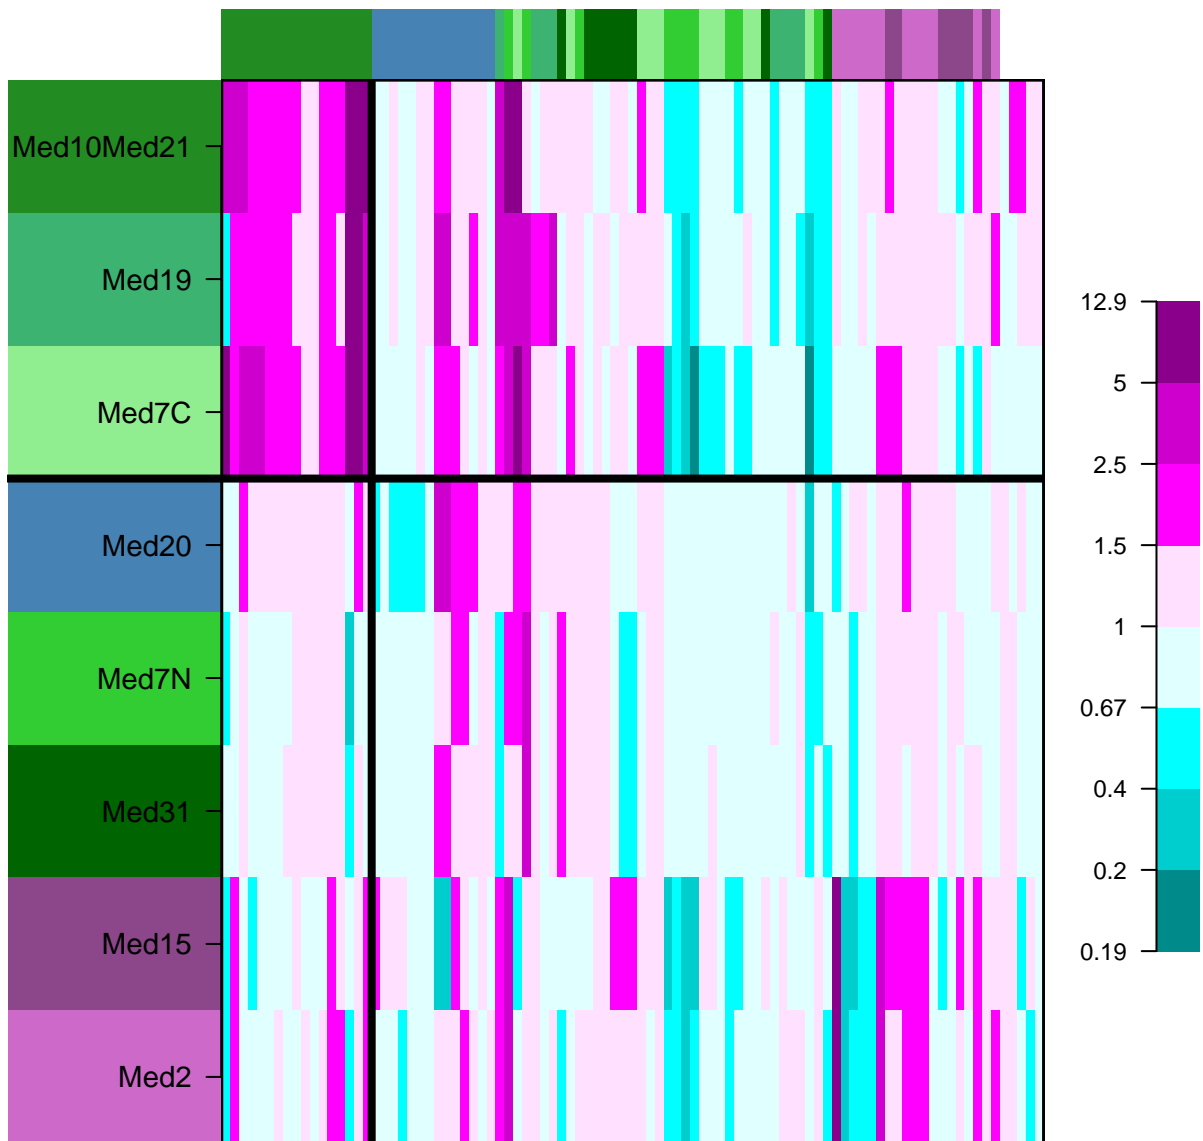



Med10Med21, upregulated: HAP3

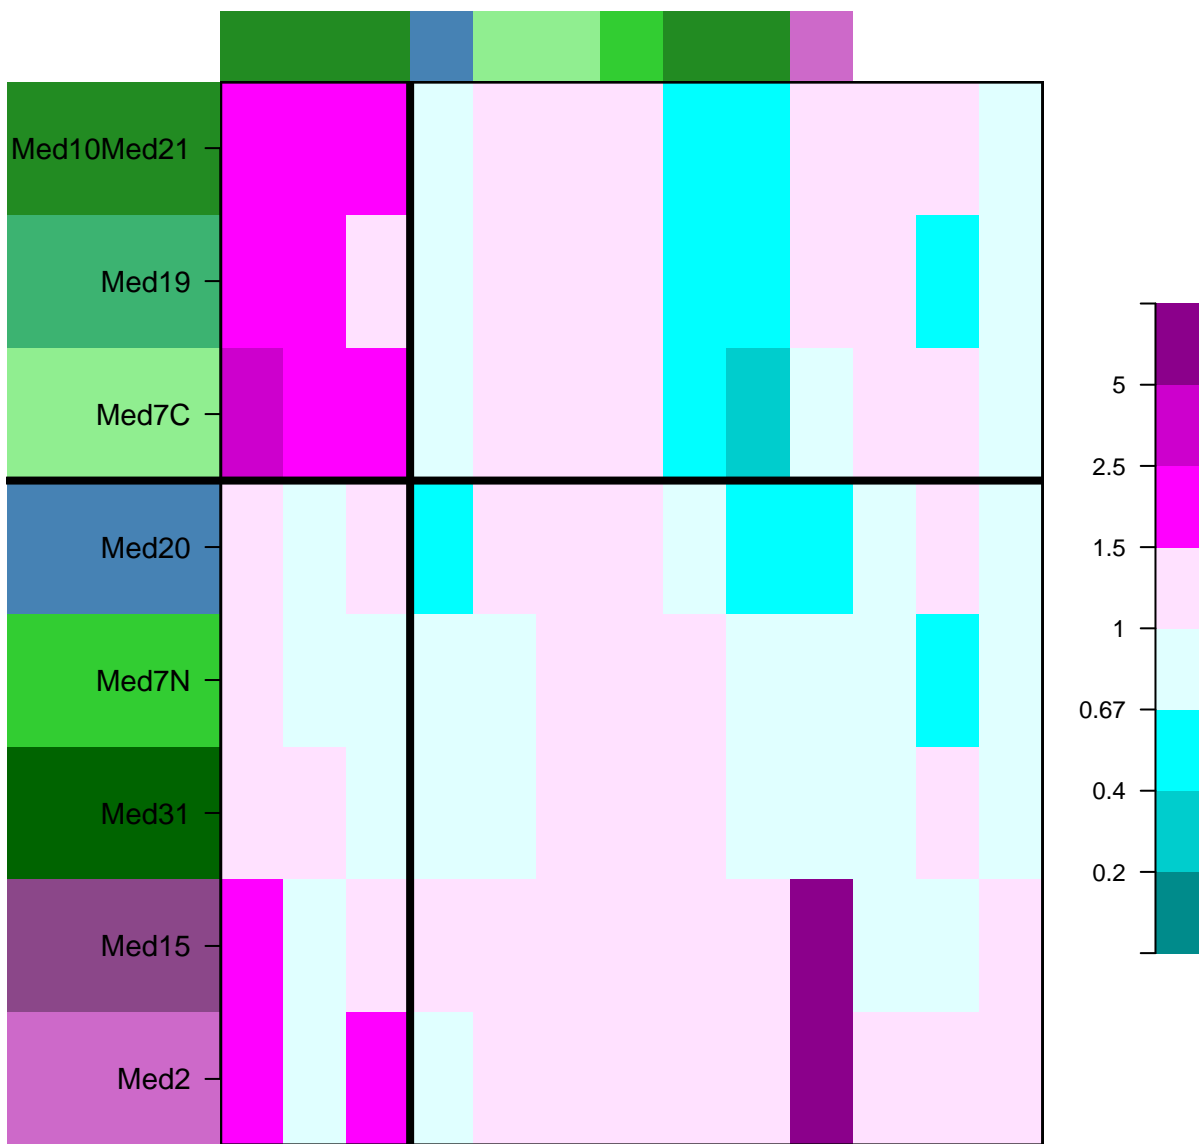



Med7C, downregulated: MBP1

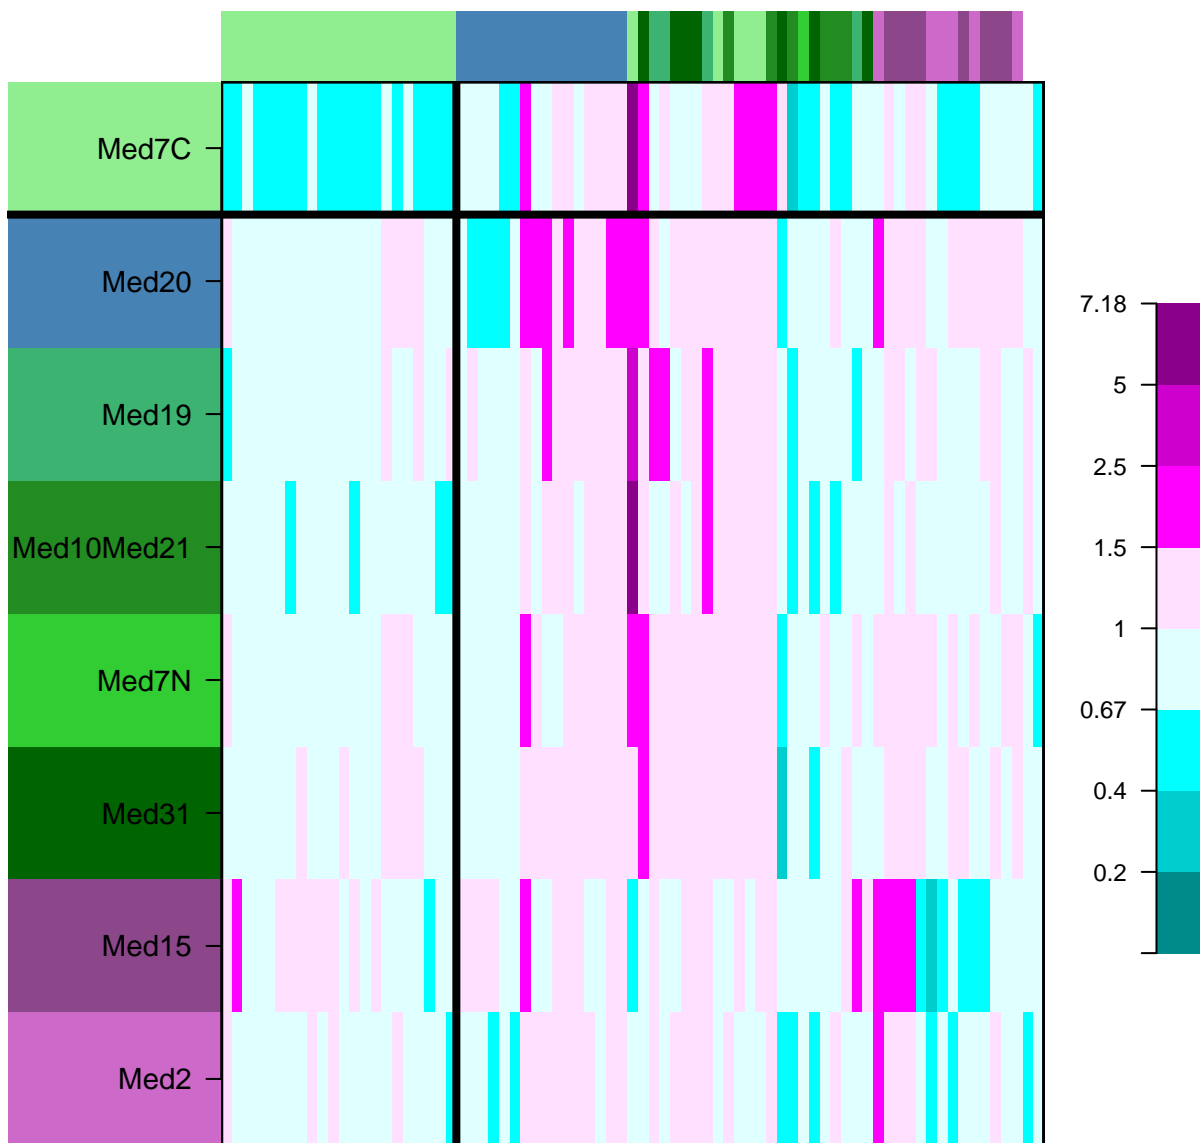





Med7N, downregulated: FKH2

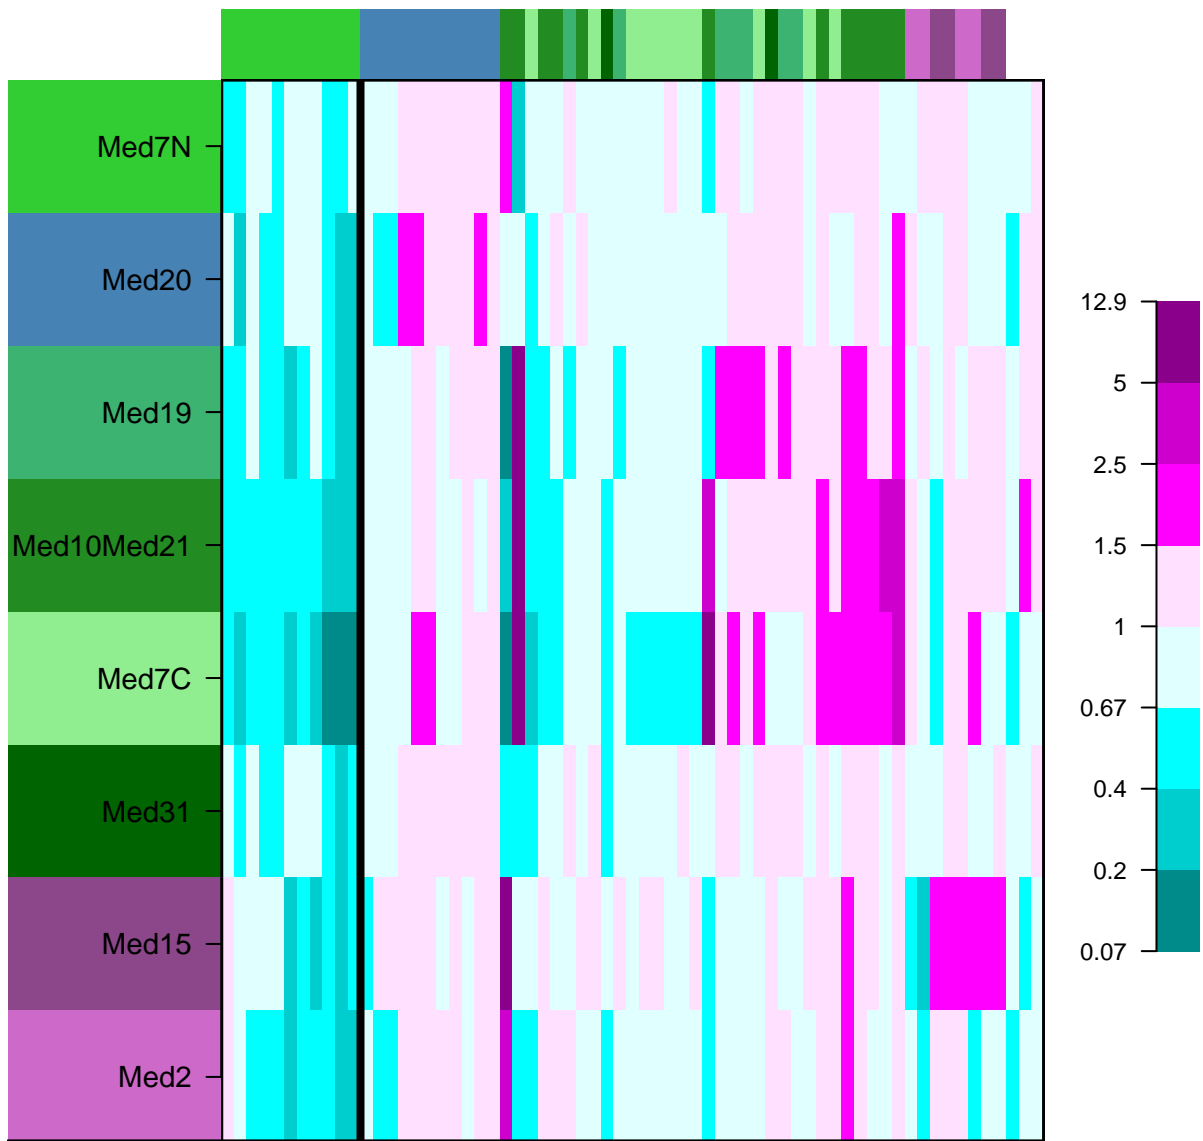



Med7N, downregulated: YOX1

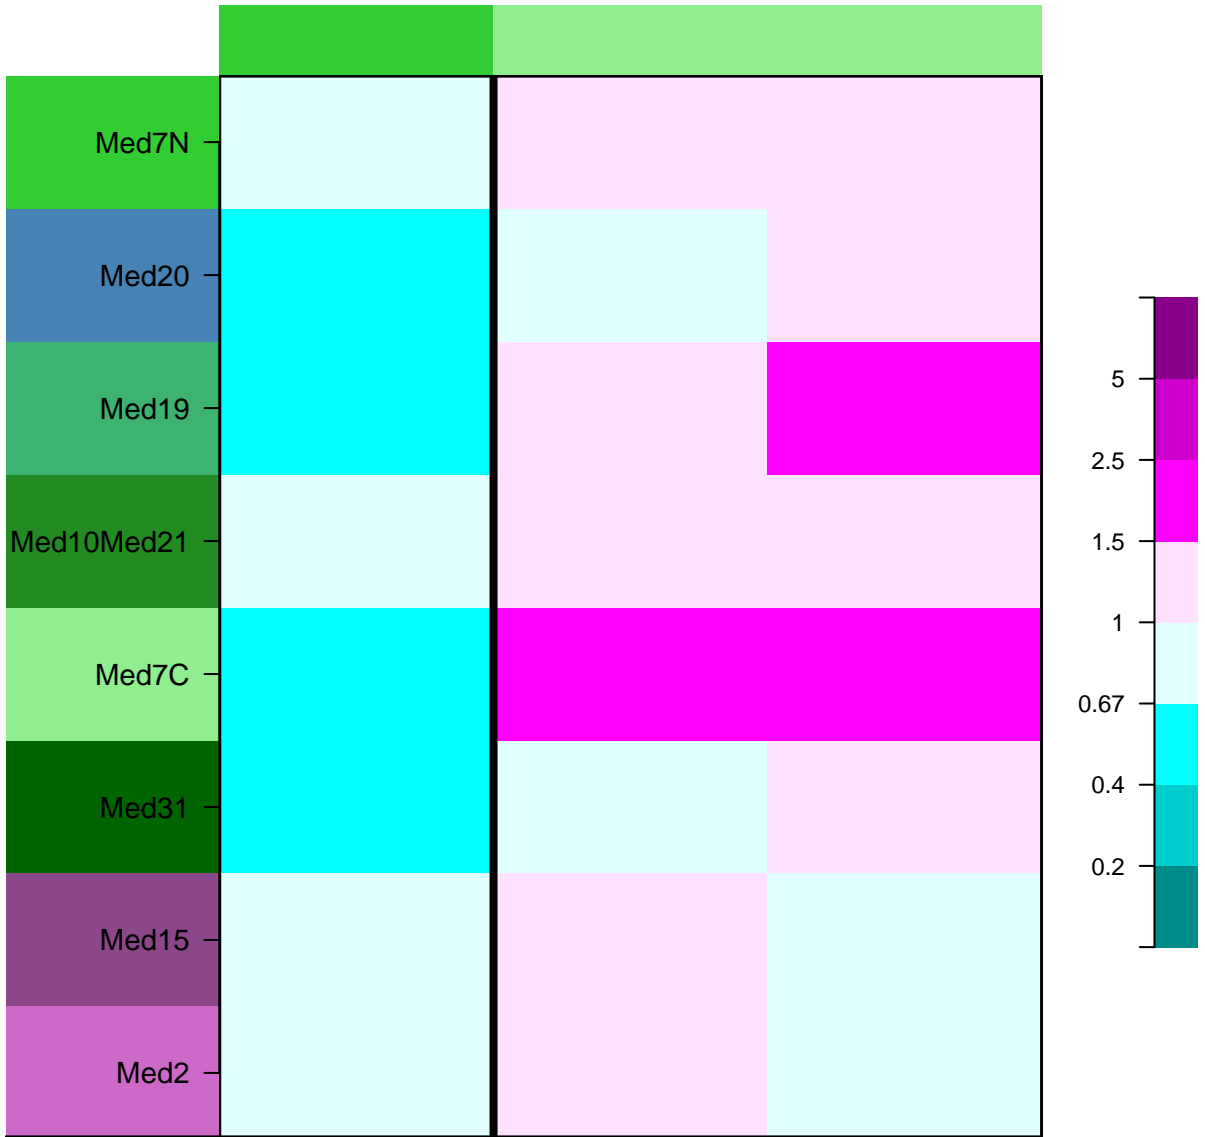



Med2, downregulated: YAP6

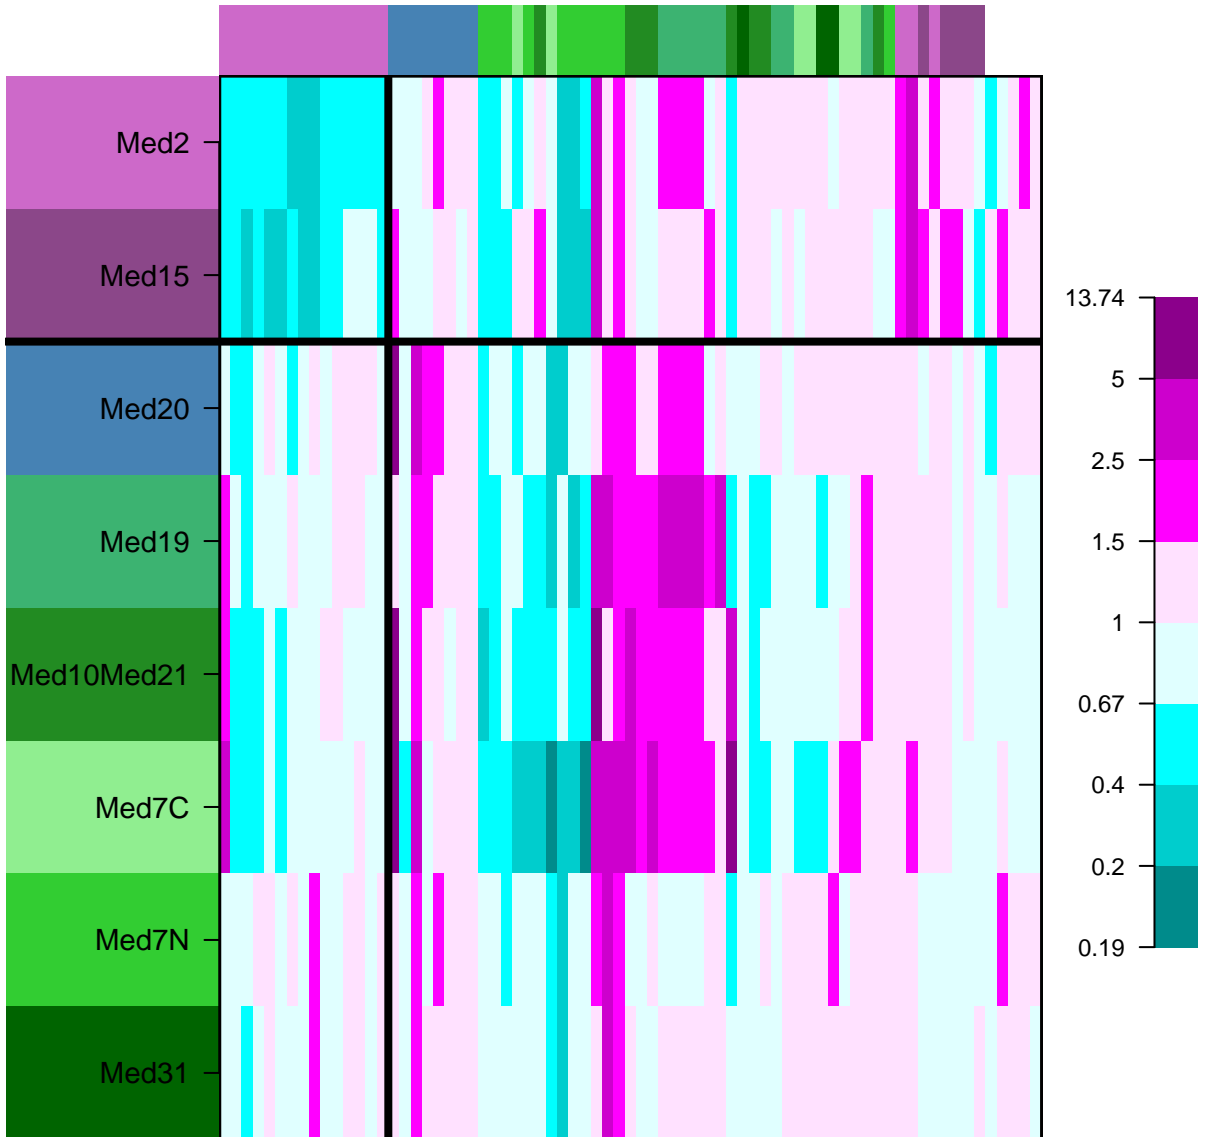



Med2, downregulated: GTS1

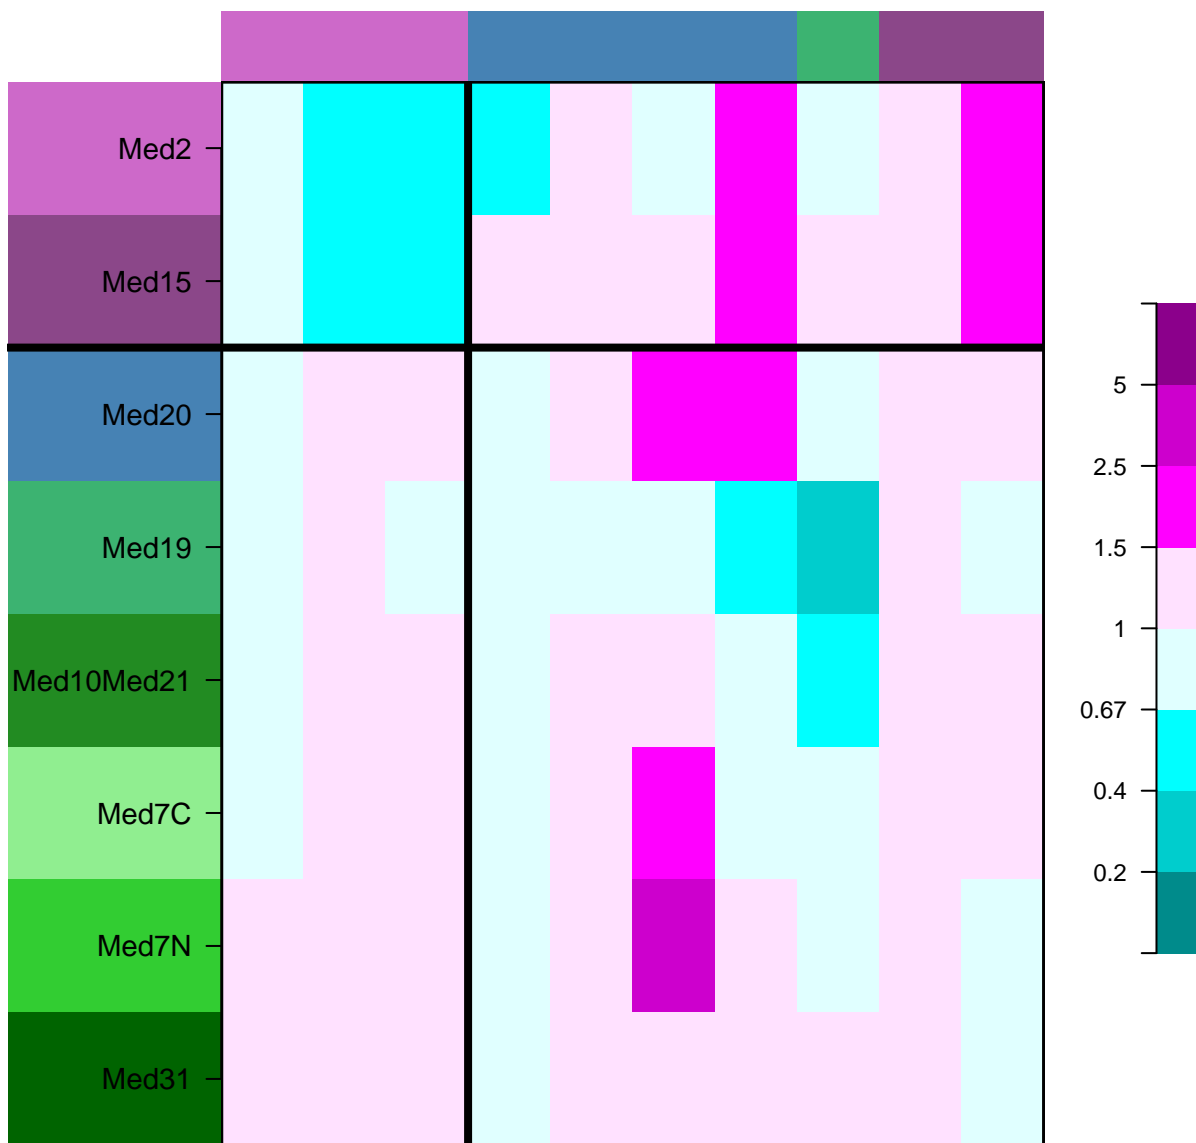

Med2, downregulated: SUM1

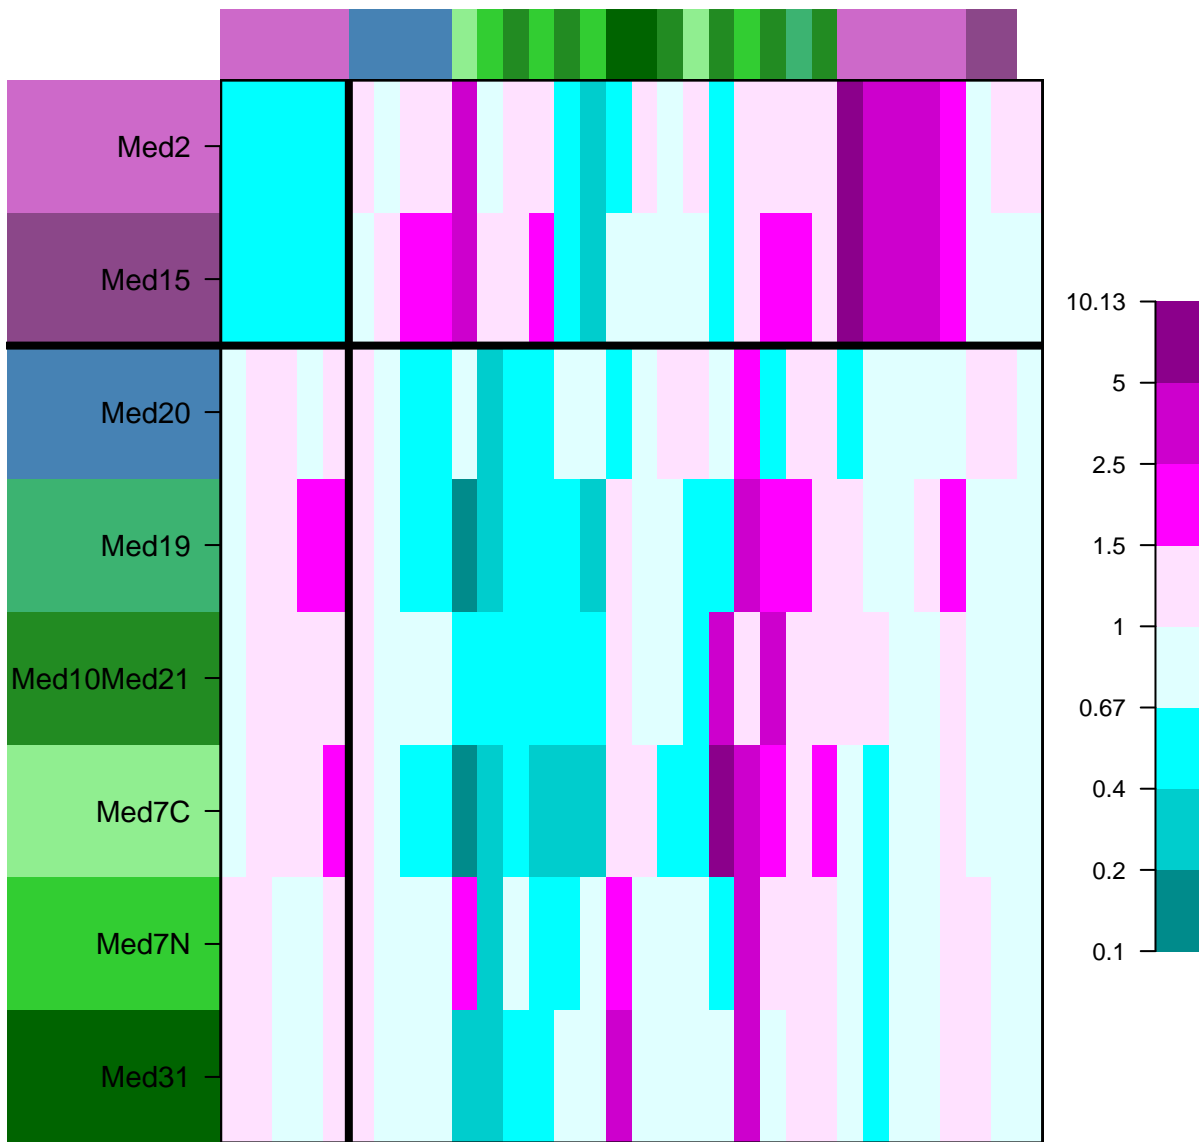

# Med2, downregulated: YAP1

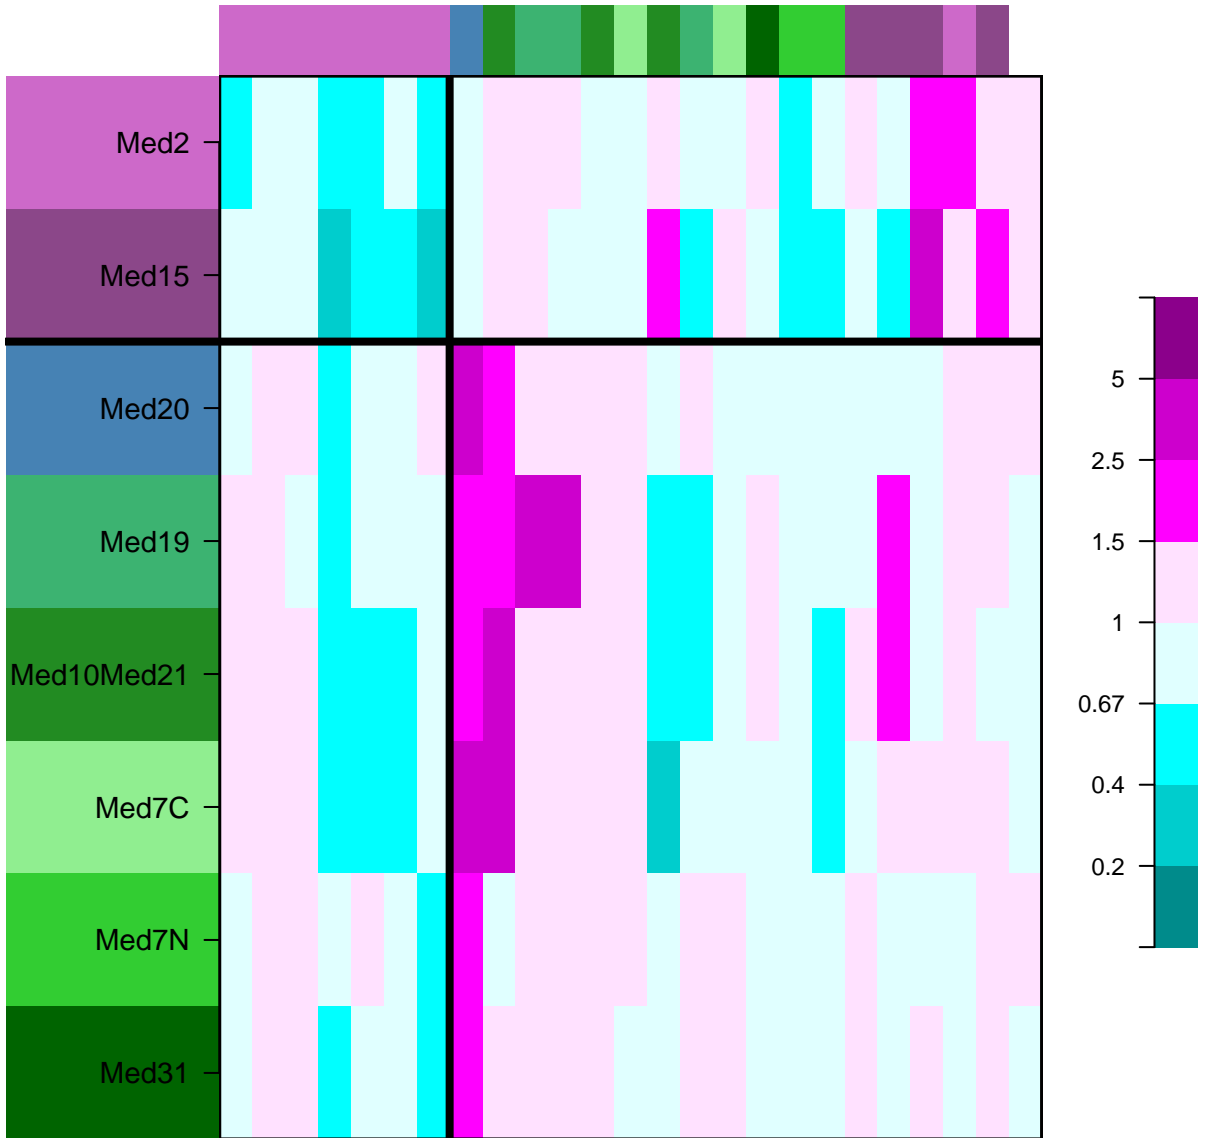

Supplement: pcbi.1002568.s003.pdf [file pcbi.1002568.s003.pdf]
