# Supplementary material for: MC EMiNEM Maps the Interaction Landscape of the Mediator
Source: PLOS journal article supplement (doi:10.1371/journal.pcbi.1002568), 2012-06-21
Supplement: S4 (10.1371/journal.pcbi.1002568.s004) [file journal.pcbi.1002568.s004]

301 Moved Permanently

# Moved Permanently

The document has moved here.

---

Apache Server at www.ploscompbiol.org Port 80
